# Supplementary material for: 4-week aerobic exercise training regulates systemic macrophage polarization in obese mice
Source: PeerJ journal article supplement (doi:10.7717/peerj.20604), 2026-01-15
Supplement: Measured_raw_data.zip [file blood parameter.xlsx]

## Sheet: blood
	Glucose	Lactate	Triglyceride	Cholesterol	b-HB	Insulin
	mg/dL	mM	mg/dL	mg/dL	mmol/L	uU/mL
1	97	1.4	96	116	1.5	7.2
2	89	1.3	93	111	1.7	10.2
3	95	1.2	98	103	1.4	8.9
4	105	1.5	111	98	1.6	8.7
5	104	1.1	98	85	1.9	8.6
6	97	1.3	102	101	1.6	7.2
7	99	1.6	87	102	1.3	8.6		Glucose	Lactate	Triglyceride	Cholesterol	b-HB	insulin
8	104	1.6	79	107	1.5	7.9		98.75	1.375	95.5	102.875	1.5625	8.4125
9	214	1.5	118	172	1.4	17.9
10	200	1.8	165	163	1.8	18.6
11	183	1.4	162	165	1.7	18.3
12	155	1.3	157	162	1.5	19.8
13	192	1.8	166	169	1.8	16.3
14	183	1.3	133	146	1.5	18.9
15	184	1.4	139	192	1.6	19.3
16	169	1.6	176	178	1.9	19.2		185	1.5125	152	168.375	1.65	18.5375
17	118	1.5	99	150	1.5	9.6
18	101	1.4	95	157	1.4	10.4
19	99	1.4	110	178	1.5	9.9
20	112	1.4	89	172	1.4	11.6
21	97	1.5	105	186	1.5	10.4
22	99	1.5	109	126	1.6	10.4
23	109	1.4	97	169	1.4	11.9
24	109	1.3	87	172	1.5	11.8		105.5	1.425	98.875	163.75	1.475	10.75
