# Supplementary material for: 4-week aerobic exercise training regulates systemic macrophage polarization in obese mice
Source: PeerJ journal article supplement (doi:10.7717/peerj.20604), 2026-01-15
Supplement: Measured_raw_data.zip [file body weight-3 groups.xlsx]

## Sheet: pre
body weight
1	26.7
2	23.5
3	26.8
4	23.6	25.15	0.924211
5	23.1
6	26.2
7	24.7
8	24.7	24.675	0.632949
9	23.9
10	23.3
11	23
12	24.4	23.65	0.31225
13	24.1
14	23.9
15	25.3
16	24	24.325	0.327554
17	22.8
18	23
19	24.2
20	22.6	23.15	0.359398
21	24
22	23.8
23	24
24	24.4	24.05	0.125831
25	23.8
26	24.5
27	23.7
28	23.2	23.8	0.267706
29	24
30	24.3
31	25.1
32	23.6	24.25	0.317543

## Sheet: Body weight
Start	body weight	Week1	Week2	Week3	Week4	Week5	Week6	Week7	Week8	Week9	Week10	Week11	Week12	Week13	Week14	Week15	Week16	final
Cage 1	1	26.6	26.7	22.56	24.8	23.8	24.1	28.2	24.7	27.1	27.6	29.3	25.662	26.226	26.508	27.072	27.354	28.2
	2	24	23.3	23.36	23.5	25	27.8	26	28.9	29.2	27.8	31.6	26.572	27.156	27.448	28.032	27.8	29.2
	3	24.8	24.7	22.88	26.9	27.2	25.3	24.6	26.7	25.5	26.4	28.2	26.026	26.598	26.884	27.456	25.3	28.6
cage 2	4	25	25.5	23.52	28.1	28.2	28.5	27.4	28.7	28.5	28.8	29.5	26.754	27.342	27.636	28.224	28.5	29.4
	5	28	27.9	24.56	25.7	26.2	26.7	27.7	29.2	29.7	29.8	31.3	27.937	28.551	28.858	29.472	26.7	30.7
	6	25.1	25.3	23.84	25.9	26.4	26.7	28.8	27.6	28	28.7	29.8	27.118	27.714	28.012	28.608	26.7	29.8
	7	23.9	24.4	23.52	25.1	24.5	26	27	25.1	28.3	26.8	29.1	26.754	27.342	27.636	28.224	26	29.4
	8	24	25.5	22.56	25.6	25.9	26.6	27.2	25.2	25.9	29.6	30.7	25.662	26.226	26.508	27.072	26.6	28.2	29.1875
Cage 3	9	24.5	24.2	28.16	28.864	29.216	29.92	30.624	31.328	28.9	27.5	31.68	32.032	32.736	33.088	33.792	24.4	35.2
	10	23.9	23.3	28.88	29.602	29.963	30.685	31.407	32.129	27.6	29.3	32.49	32.851	33.573	33.934	34.656	23.7	36.1
	11	24.5	23.5	27.04	27.716	28.054	28.73	29.406	30.082	26.5	28.4	30.42	30.758	31.434	31.772	32.448	26.4	33.8
	12	23.7	22.2	28.08	28.782	29.133	29.835	30.537	31.239	24.3	30.4	31.59	31.941	32.643	32.994	33.696	23.9	35.1
cage 4	13	23.6	24.2	28.88	29.602	29.963	30.685	31.407	32.129	27.6	29.3	32.49	32.851	33.573	33.934	34.656	23.4	36.1
	14	25.4	22.2	25.36	25.994	26.311	26.945	27.579	28.213	28.7	26.3	28.53	28.847	29.481	29.798	30.432	21	31.7
	15	24.2	22.4	29.52	30.258	30.627	31.365	32.103	32.841	25.8	25.2	33.21	33.579	34.317	34.686	35.424	22.5	36.9
	16	23.5	23.3	30.16	30.914	31.291	32.045	32.799	33.553	27.4	29.1	33.93	34.307	35.061	35.438	36.192	23.7	37.7	35.325
cage 5	17	24.2	22.7	26.32	26.978	27.307	27.965	28.623	29.281	28.61	26.7	29.61	29.939	30.597	30.926	31.584	21.2	32.9
	18	25.3	24	25.2	25.83	26.145	26.775	27.405	28.035	28.35	28.1	28.35	28.665	29.295	29.61	30.24	24.3	31.5
	19	25.6	23.7	28.32	29.028	29.382	30.09	30.798	31.506	31.86	29.2	31.86	32.214	32.922	33.276	33.984	23.8	35.4
	20	24.7	23.8	25.2	25.83	26.145	26.775	27.405	28.035	28.35	26.6	28.35	28.665	29.295	29.61	30.24	23.2	31.5
cage 6	21	24.4	24	26.48	27.142	27.473	28.135	28.797	29.459	29.79	29	29.79	30.121	30.783	31.114	31.776	25.9	33.1
	22	24.4	22.4	21.92	22.468	22.742	23.29	23.838	24.386	25.66	31.2	24.66	24.934	25.482	25.756	26.304	22	27.4
	23	23.8	24.8	27.36	28.044	28.386	29.07	29.754	30.438	29.78	29.8	30.78	31.122	31.806	32.148	32.832	25.8	34.2
	24	25.8	26.1	26.96	27.634	27.971	28.645	29.319	29.993	28.33	29.7	30.33	30.667	31.341	31.678	32.352	26.8	33.7	32.4625
