# Supplementary material for: 4-week aerobic exercise training regulates systemic macrophage polarization in obese mice
Source: PeerJ journal article supplement (doi:10.7717/peerj.20604), 2026-01-15
Supplement: Measured_raw_data.zip [file CRP ELISA.xlsx]

## Sheet: CRP
				CRP1
MULTISKAN MS PRIMARY EIA V. 1.5-0
ABSORBANCE MODE
CONTINUOUS MOVEMENT
FILTER	450nm
SINGLE WELL BLANK		0.0541
ABSORBANCES
2025/6/5/
plate 1
	1	2	3	4	5	6	7	8	9	10	11	12
A	Blank	75 μg/L	150 μg/L	300 μg/L	600 μg/L	1200 μg/L								Conc.（μg/L）	75	150	300	600	1200
B	1	2	3	4	5	6	7	8	9	10	11	12		OD value	0.0838	0.1991	0.4988	1.1239	1.9376
C	13	14	15	16	17	18	19	20	21	22	23	24
D
E
F
G
H
OD value 1
	1	2	3	4	5	6	7	8	9	10	11	12
A	0.0541	0.1379	0.2532	0.5529	1.178	1.9917
B	0.3152	0.2707	0.3257	0.2481	0.2602	0.2295	0.2466	0.2921	0.3833	0.4151	0.3971	0.3464
C	0.4013	0.4363	0.3973	0.3929	0.3281	0.2941	0.2956	0.2655	0.3255	0.3439	0.3243	0.3122
D
E
F
G
H
blank	0.0541
Dilution factor	5		Y= 0.0017x - 0.0081
sample numer	OD value	corrected OD value	CRP (μg/L)
1	0.3152	0.2611	791.765
2	0.2707	0.2166	660.882
3	0.3257	0.2716	822.647
4	0.2481	0.194	594.412
5	0.2602	0.2061	630
6	0.2295	0.1754	539.706
7	0.2466	0.1925	590
8	0.2921	0.238	723.824
9	0.3833	0.3292	992.059
10	0.4151	0.361	1085.59
11	0.3971	0.343	1032.65
12	0.3464	0.2923	883.529
13	0.4013	0.3472	1045
14	0.4363	0.3822	1147.94
15	0.3973	0.3432	1033.24
16	0.3929	0.3388	1020.29
17	0.3281	0.274	829.706
18	0.2941	0.24	729.706
19	0.2956	0.2415	734.118
20	0.2655	0.2114	645.588
21	0.3255	0.2714	822.059
22	0.3439	0.2898	876.176
23	0.3243	0.2702	818.529
24	0.3122	0.2581	782.941
			669.154	101.272
			1030.04	75.8099
			779.853	73.3716
