# Supplementary material for: 4-week aerobic exercise training regulates systemic macrophage polarization in obese mice
Source: PeerJ journal article supplement (doi:10.7717/peerj.20604), 2026-01-15
Supplement: Measured_raw_data.zip [file Food consumption.xlsx]

## Sheet: Food intake
				per mouse				per mouse				per mouse				per mouse
Feb. 8		Feb. 12			Feb. 12	Feb. 16			Feb. 16	Feb. 19			Feb. 19	Feb. 23			Feb. 23	Feb. 27
cage 1 (n=4)	94.3	46.3	48	4	101.2	63.4	37.8	3.15	104.8	76.2	28.6	3.17778	102.7	64.1	38.6	3.21667	108.1	67.8	40.3	3.35833
cage 2 (n=4)	103.9	51.9	52	4.33333	102.7	56.7	46	3.83333	109.5	75.3	34.2	3.8	104.1	64.8	39.3	3.275	109.8	68.9	40.9	3.40833
cage 3 (n=4)	124	58.7	65.3	3.265	118.4	53	65.4	3.27	122.4	69.2	53.2	3.54667	115.4	52.3	63.1	3.155	119.9	62.1	57.8	2.89
cage 4 (n=4)	104.1	60.2	43.9	3.65833	102	53	49	4.08333	108.1	83	25.1	2.78889	100.4	65.5	34.9	2.90833	108	69.5	38.5	3.20833
cage 5 (n=4)	106	49.6	56.4	4.7	100.6	55.7	44.9	3.74167	109.2	84.2	25	2.77778	103.1	71.4	31.7	2.64167	106.7	70.5	36.2	3.01667
cage 6 (n=4)	120.9	40.4	80.5	4.025	102	25.6	76.4	3.82	122.1	73.9	48.2	3.21333	117	61.4	55.6	2.78	115.3	55.1	60.2	3.01
	Feb. 27	Mar. 1			Mar. 1	Mar. 6			Mar. 6	Mar. 12			Mar. 12	Mar. 17			Mar. 17	Mar. 23
cage 1 (n=4)	106.2	66.7	39.5	3.29167	112.3	62.9	49.4	3.29333	117.5	55.6	61.9	3.43889	117.8	64.9	52.9	3.52667	116	51.2	64.8	3.6
cage 2 (n=4)	107.8	67.4	40.4	3.36667	112.6	60.8	51.8	3.45333	111.9	47.9	64	3.55556	118.4	63.4	55	3.66667	115.9	53.3	62.6	3.47778
cage 3 (n=4)	112	53.3	58.7	2.935	123.1	44.4	78.7	3.148	128.3	33	95.3	3.17667	120.6	39.7	80.9	3.236	126.4	34.4	92	3.06667
cage 4 (n=4)	108.3	67.8	40.5	3.375	113	58.7	54.3	3.62	117.7	48.7	69	3.83333	118.4	55.8	62.6	4.17333	117.7	42.8	74.9	4.16111
cage 5 (n=4)	108	72.9	35.1	2.925	114.2	64.5	49.7	3.31333	118.6	56.3	62.3	3.46111	113.6	60.6	53	3.53333	113.9	54.3	59.6	3.31111
cage 6 (n=4)	112.7	47.4	65.3	3.265	125.7	38.6	87.1	3.484	126.5	21	105.5	3.51667	130.2	33.9	96.3	3.852	127.7	19.5	108.2	3.60667
	Mar. 23	Mar. 30			Mar. 30	Arp. 5			Arp. 5	Arp. 9			Arp. 9	Arp. 13			Arp. 13	Arp. 17
cage 1 (n=4)	126	50.6	75.4	3.59048	112.3	52.9	59.4	3.96	116.45	54.6	61.85	3.43611	120.8	65.5	55.3	3.68667	120	51.2	68.8	3.82222
cage 2 (n=4)	124.1	51.1	73	3.47619	102.6	59.8	42.8	2.85333	110.9	45.3	65.6	3.64444	117.4	61.4	56	3.73333	116.9	53.3	63.6	3.53333
cage 3 (n=4)	131.9	14.3	117.6	3.36	124.1	45.4	78.7	3.148	126.3	35.1	91.2	3.04	119.6	38.5	81.1	3.244	125.4	34.4	91	3.03333
cage 4 (n=4)	145.9	56.7	89.2	4.24762	103	57.7	45.3	3.02	117.7	44.7	73	4.05556	121.4	53.8	67.6	4.50667	117.7	42.8	74.9	4.16111
cage 5 (n=4)	142.6	72.9	69.7	3.31905	115.2	63.1	52.1	3.47333	119.3	54.7	64.6	3.58889	117.6	58.1	59.5	3.96667	116.9	54.3	62.6	3.47778
cage 6 (n=4)	138.8	10.5	128.3	3.66571	115.7	38.5	77.2	3.088	125.9	28.4	97.5	3.25	128.2	34.9	93.3	3.732	132.7	19.5	113.2	3.77333
	Arp. 17	Arp. 22			Arp. 22	Arp. 26			Arp. 26	Arp. 30			Arp. 30	May. 4			May. 4	May. 9
cage 1 (n=4)	118	49.6	68.4	3.25714	120.3	61.9	58.4	3.89333	117.5	55.6	61.9	3.43889	117.8	64.9	52.9	3.52667	111.4	46.2	65.2	3.62222
cage 2 (n=4)	120.1	51.1	69	3.28571	112.5	57.8	54.7	3.64667	111.9	47.9	64	3.55556	118.4	63.4	55	3.66667	113.4	48.3	65.1	3.61667
cage 3 (n=4)	141.9	15.3	126.6	3.61714	123.1	44.4	78.7	3.148	128.3	33	95.3	3.17667	121.6	29.7	91.9	3.676	146.4	34.4	112	3.73333
cage 4 (n=4)	145.9	54.7	91.2	4.34286	113	58.7	54.3	3.62	117.7	48.7	69	3.83333	118.4	65.8	52.6	3.50667	117.7	52.8	64.9	3.60556
cage 5 (n=4)	152.6	65.9	86.7	4.12857	124.2	64.5	59.7	3.98	115.6	46.3	69.3	3.85	123.6	59.6	64	4.26667	133.9	57.3	76.6	4.25556
cage 6 (n=4)	138.8	10.5	128.3	3.66571	135.7	38.6	97.1	3.884	146.5	25.1	121.4	4.04667	131.2	33.9	97.3	3.892	137.7	13.5	124.2	4.14
	May. 9	May. 13			May. 13	May. 18			May. 18	May. 22			May. 22	May. 26			May. 26	May. 30
cage 1 (n=4)	121.4	48.6	72.8	3.46667	111.3	52.9	58.4	3.89333	115.5	54.6	60.9	3.38333	115.5	59.9	55.6	3.70667	119	51.2	67.8	3.76667
cage 2 (n=4)	123.1	47.1	76	3.61905	112.6	60.8	51.8	3.45333	112.9	45.5	67.4	3.74444	115.9	61.4	54.5	3.63333	117.9	55.3	62.6	3.47778
cage 3 (n=4)	129.3	14.3	115	3.28571	122.2	34.4	87.8	3.512	128.3	27	101.3	3.37667	120.6	39.7	80.9	3.236	125.4	33.4	92	3.06667
cage 4 (n=4)	125.3	56.7	68.6	3.26667	115.2	58.2	57	3.8	117.7	54.7	63	3.5	118.4	66.8	51.6	3.44	117.7	52.8	64.9	3.60556
cage 5 (n=4)	149.6	62.9	86.7	4.12857	124.2	64.5	59.7	3.98	118.6	46.3	72.3	4.01667	113.6	51.6	62	4.13333	123.9	49.2	74.7	4.15
cage 6 (n=4)	154.8	7.5	147.3	4.20857	144.3	37.4	106.9	4.276	136.5	12.8	123.7	4.12333	121.2	18.9	102.3	4.092	137.7	17.5	120.2	4.00667
