# Supplementary material for: 4-week aerobic exercise training regulates systemic macrophage polarization in obese mice
Source: PeerJ journal article supplement (doi:10.7717/peerj.20604), 2026-01-15
Supplement: Measured_raw_data.zip [file Heart liver weight.xlsx]

## Sheet: Sheet1
group	number	heart weight (g)	Liver weight (g)
Control	1	0.143	1.34
Control	2	0.182	1.481
Control	3	0.201	1.38
Control	4	0.184	1.306
Control	5	0.149	0.91
Control	6	0.18	1.072
Control	7	1.125	0.927
Control	8	0.164	1.107
high-fat	1	0.13	1.827
high-fat	2	0.148	1.818
high-fat	3	0.18	2.059
high-fat	4	0.164	2.5
high-fat	5	0.173	1.285
high-fat	6	0.168	1.738
high-fat	7	0.168	2.185
high-fat	8	0.16	2.109
high-fat	1	0.138	1.912
high-fat	2	0.176	2.017
HF-exercise	1	0.16	0.919
HF-exercise	2	0.147	1.095
HF-exercise	3	0.144	1.59
HF-exercise	4	0.168	1.354
HF-exercise	5	0.149	1.24
HF-exercise	6	0.116	1.269
HF-exercise	7	0.133	1.474
HF-exercise	8	0.134	1.23
		0.291	1.19037
		0.1605	1.945
		0.143875	1.27138
			0.215512
			0.319773
			0.209552
