# Supplementary material for: 4-week aerobic exercise training regulates systemic macrophage polarization in obese mice
Source: PeerJ journal article supplement (doi:10.7717/peerj.20604), 2026-01-15
Supplement: Measured_raw_data.zip [file IL-1 beta ELISA.xlsx]

## Sheet: IL-1β
				IL-1β
MULTISKAN MS PRIMARY EIA V. 1.5-0
ABSORBANCE MODE
CONTINUOUS MOVEMENT
FILTER	450nm
SINGLE WELL BLANK		0.0465
ABSORBANCES
plate 1
	1	2	3	4	5	6	7	8	9	10	11	12
A	blank	5 ng/L	10 ng/L	20 ng/L	40 ng/L	80 ng/L								Conc.（ng/L）	5	10	20	40	80
B	1	2	3	4	5	6	7	8	9	10	11	12		OD值	0.0748	0.1661	0.3818	0.884	1.6731
C	13	14	15	16	17	18	19	20	21	22	23	24
D
E
F
G
H
Readiing（OD）1
	1	2	3	4	5	6	7	8	9	10	11	12
A	0.0465	0.1213	0.2126	0.4283	0.9305	1.7196
B	0.2087	0.251	0.2821	0.288	0.3127	0.2828	0.3672	0.311	0.4139	0.3888	0.4265	0.3909
C	0.373	0.3719	0.3915	0.3823	0.2877	0.3225	0.2362	0.3057	0.3468	0.2931	0.2969	0.2969
D
E
F
G
H
blank	0.0465
dilution factor	5		Y= 0.0216x - 0.0332
sample number	OD value	corrected OD value	IL-1β conc. (ng/L)
1	0.2087	0.1622	45.2315
2	0.251	0.2045	55.0231
3	0.2821	0.2356	62.2222
4	0.288	0.2415	63.588
5	0.3127	0.2662	69.3056
6	0.2828	0.2363	62.3843
7	0.3672	0.3207	81.9213
8	0.311	0.2645	68.912	63.5735	10.7622
9	0.4139	0.3674	92.7315
10	0.3888	0.3423	86.9213
11	0.4265	0.38	95.6481
12	0.3909	0.3444	87.4074
13	0.373	0.3265	83.2639
14	0.3719	0.3254	83.0093
15	0.3915	0.345	87.5463
16	0.3823	0.3358	85.4167	87.7431	4.40917
17	0.2877	0.2412	63.5185
18	0.3225	0.276	71.5741
19	0.2362	0.1897	51.5972
20	0.3057	0.2592	67.6852
21	0.3468	0.3003	77.1991
22	0.2931	0.2466	64.7685
23	0.2969	0.2504	65.6481
24	0.2969	0.2504	65.6481	65.9549	7.31608
