# Supplementary material for: 4-week aerobic exercise training regulates systemic macrophage polarization in obese mice
Source: PeerJ journal article supplement (doi:10.7717/peerj.20604), 2026-01-15
Supplement: Measured_raw_data.zip [file IL-2 ELISA.xlsx]

## Sheet: IL-2
				IL-2
MULTISKAN MS PRIMARY EIA V. 1.5-0
ABSORBANCE MODE
CONTINUOUS MOVEMENT
FILTER	450nm
SINGLE WELL BLANK		0.0509
ABSORBANCES
Plate 1
	1	2	3	4	5	6	7	8	9	10	11	12
A	blank	75 ng/L	150 ng/L	300 ng/L	600 ng/L	1200 ng/L								Conc（ng/L）	30	60	120	240	480
B	1	2	3	4	5	6	7	8	9	10	11	12		OD value	0.075	0.2038	0.4232	0.9876	1.8473
C	13	14	15	16	17	18	19	20	21	22	23	24
D
E
F
G
H
Reading OD1
	1	2	3	4	5	6	7	8	9	10	11	12
A	0.0509	0.1259	0.2547	0.4741	1.0385	1.8982
B	0.3043	0.2673	0.2994	0.2968	0.302	0.307	0.3448	0.3668	0.2628	0.186	0.2517	0.2497
C	0.2003	0.2139	0.2335	0.1964	0.3298	0.3499	0.3665	0.4044	0.3828	0.4116	0.3941	0.3657
D
E
F
G
H
blank	0.0509
dilution factor	5		Y= 0.004x - 0.0303
sample number	OD value	corrected OD value	IL-2 conc. (ng/L)
1	0.3043	0.2534	354.625
2	0.2673	0.2164	308.375
3	0.2994	0.2485	348.5
4	0.2968	0.2459	345.25
5	0.302	0.2511	351.75
6	0.307	0.2561	358
7	0.3448	0.2939	405.25
8	0.3668	0.3159	432.75	363.062	38.5097
9	0.2628	0.2119	302.75
10	0.186	0.1351	206.75
11	0.2517	0.2008	288.875
12	0.2497	0.1988	286.375
13	0.2003	0.1494	224.625
14	0.2139	0.163	241.625
15	0.2335	0.1826	266.125
16	0.1964	0.1455	219.75	254.609	36.2662
17	0.3298	0.2789	386.5
18	0.3499	0.299	411.625
19	0.3665	0.3156	432.375
20	0.4044	0.3535	479.75
21	0.3828	0.3319	452.75
22	0.4116	0.3607	488.75
23	0.3941	0.3432	466.875
24	0.3657	0.3148	431.375	443.75	34.9057
