# Supplementary material for: 4-week aerobic exercise training regulates systemic macrophage polarization in obese mice
Source: PeerJ journal article supplement (doi:10.7717/peerj.20604), 2026-01-15
Supplement: Measured_raw_data.zip [file IL-6 ELISA.xlsx]

## Sheet: IL-6
				IL-6
MULTISKAN MS PRIMARY EIA V. 1.5-0
ABSORBANCE MODE
CONTINUOUS MOVEMENT
FILTER	450nm
SINGLE WELL BLANK		0.0677
ABSORBANCES
Plate 1
	1	2	3	4	5	6	7	8	9	10	11	12
A	blank	7.5 pg/ml	15 pg/ml	30 pg/ml	60 pg/ml	120 pg/ml								Conc.（pg/ml）	7.5	15	30	60	120
B	1	2	3	4	5	6	7	8	9	10	11	12		OD value	0.0682	0.2191	0.4985	0.9716	2.1521
C	13	14	15	16	17	18	19	20	21	22	23	24
D
E
F
G
H
Reading（OD）1
	1	2	3	4	5	6	7	8	9	10	11	12
A	0.0677	0.1359	0.2868	0.5662	1.0393	2.2198
B	0.2805	0.3021	0.3113	0.3118	0.2979	0.2852	0.3134	0.3898	0.4499	0.4644	0.387	0.3633
C	0.3973	0.4209	0.4077	0.4194	0.3112	0.3559	0.2667	0.3003	0.3285	0.3089	0.385	0.3924
D
E
F
G
H
blank	0.0677
dilution factor	5		Y= 0.0183x - 0.0709_x000B_
sample number	OD value	corrected OD value	IL-6 conc. (pg/ml)
1	0.2805	0.2128	77.5137
2	0.3021	0.2344	83.4153
3	0.3113	0.2436	85.929
4	0.3118	0.2441	86.0656
5	0.2979	0.2302	82.2678
6	0.2852	0.2175	78.7978
7	0.3134	0.2457	86.5027			SE
8	0.3898	0.3221	107.377	85.9836	9.2716	3.27801
9	0.4499	0.3822	123.798
10	0.4644	0.3967	127.76
11	0.387	0.3193	106.612
12	0.3633	0.2956	100.137
13	0.3973	0.3296	109.426
14	0.4209	0.3532	115.874
15	0.4077	0.34	112.268
16	0.4194	0.3517	115.464	113.917	9.2716	3.16685
17	0.3112	0.2435	85.9016
18	0.3559	0.2882	98.1148
19	0.2667	0.199	73.7432
20	0.3003	0.2326	82.9235
21	0.3285	0.2608	90.6284
22	0.3089	0.2412	85.2732
23	0.385	0.3173	106.066
24	0.3924	0.3247	108.087	91.3422	11.8959	4.20584
