# Supplementary material for: 4-week aerobic exercise training regulates systemic macrophage polarization in obese mice
Source: PeerJ journal article supplement (doi:10.7717/peerj.20604), 2026-01-15
Supplement: Measured_raw_data.zip [file IL-10 ELISA.xlsx]

## Sheet: IL-10
				IL-10
MULTISKAN MS PRIMARY EIA V. 1.5-0
ABSORBANCE MODE
CONTINUOUS MOVEMENT
FILTER	450nm
SINGLE WELL BLANK		0.0649
ABSORBANCES
Plate 1
	1	2	3	4	5	6	7	8	9	10	11	12
A	blank	62.5 pg/ml	125 pg/ml	250 pg/ml	500 pg/ml	1000 pg/ml								Conc.（pg/ml）	62.5	125	250	500	1000
B	1	2	3	4	5	6	7	8	9	10	11	12		OD value	0.0634	0.1415	0.3588	0.8469	1.6714
C	13	14	15	16	17	18	19	20	21	22	23	24
D
E
F
G
H
Reading（OD value）1
	1	2	3	4	5	6	7	8	9	10	11	12
A	0.0649	0.1283	0.2064	0.4237	0.9118	1.7363
B	0.574	0.5538	0.6008	0.5745	0.6304	0.6004	0.6171	0.564	0.4645	0.5386	0.5096	0.441
C	0.4562	0.478	0.4054	0.4439	0.5371	0.582	0.5609	0.6275	0.5556	0.5735	0.4821	0.6148
D
E
F
G
H
blank	0.0649
dilution factor	5		Y= 0.0017x - 0.0582_x000B__x000B_
sample number	OD value	corrected OD value	IL-10 conc.（pg/ml)
1	0.574	0.5091	1668.53
2	0.5538	0.4889	1609.12
3	0.6008	0.5359	1747.35
4	0.5745	0.5096	1670
5	0.6304	0.5655	1834.41
6	0.6004	0.5355	1746.18
7	0.6171	0.5522	1795.29
8	0.564	0.4991	1639.12	1713.75	79.1619
9	0.4645	0.3996	1346.47
10	0.5386	0.4737	1564.41
11	0.5096	0.4447	1479.12
12	0.441	0.3761	1277.35
13	0.4562	0.3913	1322.06
14	0.478	0.4131	1386.18
15	0.4054	0.3405	1172.65
16	0.4439	0.379	1285.88	1354.26	122.733
17	0.5371	0.4722	1560
18	0.582	0.5171	1692.06
19	0.5609	0.496	1630
20	0.6275	0.5626	1825.88
21	0.5556	0.4907	1614.41
22	0.5735	0.5086	1667.06
23	0.4821	0.4172	1398.24
24	0.6148	0.5499	1788.53	1647.02	133.773
