# Supplementary material for: 4-week aerobic exercise training regulates systemic macrophage polarization in obese mice
Source: PeerJ journal article supplement (doi:10.7717/peerj.20604), 2026-01-15
Supplement: Measured_raw_data.zip [file mArg1 ELISA.xlsx]

## Sheet: Arg1
				Arg1
MULTISKAN MS PRIMARY EIA V. 1.5-0
ABSORBANCE MODE
CONTINUOUS MOVEMENT
FILTER	450nm
SINGLE WELL BLANK		0.0561
ABSORBANCES
2025-06-06
Plate 1
	1	2	3	4	5	6	7	8	9	10	11	12
A	blank	75 μg/L	150 μg/L	300 μg/L	600 μg/L	1200 μg/L	0.3833	0.4151	0.3971	0.3464	0.4013	0.4363
B	0.2652	0.2707	0.2257	0.2581	0.2602	0.2695	0.2466	0.2421
C	0.3281	0.3941	0.2956	0.3655	0.3255	0.3239	0.3243	0.3922
D
E
F
G
H
Reading（OD）1
	1	2	3	4	5	6	7	8	9	10	11	12
A	0.0561	0.1379	0.2532	0.5529	1.178	1.9917	0.3472	0.3822	0.3432	0.3388	0.3292	0.361
B	0.25214	0.2898	0.2202	0.2581	0.214	0.2576	0.2415	0.2414	0.3833	0.4151	0.3971	0.3464
C	0.4061	0.3754	0.2925	0.338	0.3611	0.3166	0.3716	0.394	0.3255	0.3439	0.3243	0.3122
D
E
F
G
H
blank	0.0561
Dilution facotr	5		Y= 0.0017x - 0.0081
Sample number	OD value	corrected OD value	Arg1 Conc. (ng/L)
1	0.3833	0.3472	0.36525
2	0.4151	0.3822	0.39865
3	0.3971	0.3432	0.37015
4	0.3464	0.3388	0.3426
5	0.4013	0.3292	0.36525
6	0.4363	0.361	0.39865		0.369162
7	0.3973	0.343	0.37015
8	0.3929	0.2923	0.3426	0.369162	1
9	0.2652	0.25214	0.25867
10	0.2707	0.2898	0.28025
11	0.2257	0.2202	0.22295
12	0.2581	0.2581	0.2581
13	0.2602	0.214	0.2371
14	0.2695	0.2576	0.26355
15	0.2466	0.2415	0.24405
16	0.2421	0.2414	0.24175	0.250802	0.679382
17	0.3281	0.4061	0.3671
18	0.3941	0.3754	0.38475
19	0.2956	0.2925	0.29405
20	0.3655	0.338	0.35175
21	0.3255	0.3611	0.3433
22	0.3239	0.3166	0.32025
23	0.3243	0.3716	0.34795
24	0.3922	0.394	0.3931	0.350281	0.948854
