# Supplementary material for: 4-week aerobic exercise training regulates systemic macrophage polarization in obese mice
Source: PeerJ journal article supplement (doi:10.7717/peerj.20604), 2026-01-15
Supplement: Measured_raw_data.zip [file sCD163 ELISA.xlsx]

## Sheet: CD163
				CD163
MULTISKAN MS PRIMARY EIA V. 1.5-0
ABSORBANCE MODE
CONTINUOUS MOVEMENT
FILTER	450nm
SINGLE WELL BLANK		0.4085
ABSORBANCES
Plate 1
	1	2	3	4	5	6	7	8	9	10	11	12
A	blank	50 ng/L	100 ng/L	200 ng/L	400 ng/L	800 ng/L
B	1	2	3	4	5	6	7	8	9	10	11	12
C	13	14	15	16	17	18	19	20	21	22	23	24
D
E
F
G
H
Reading（OD）1
	1	2	3	4	5	6	7	8	9	10	11	12
A	0.4085	0.3952	0.3816	0.3987	0.371	0.383	0.3883	0.406	0.2812	0.2666	0.2122	0.2226
B	0.2337	0.2201	0.2599	0.2108	0.5348	0.4223	0.5091	0.4606	0.5335	0.469	0.5253	0.4557
C	0.5337	0.5201	0.5199	0.5108	0.4348	0.4223	0.4091	0.3606	0.4335	0.469	0.4253	0.4557
D	0.3069	0.3189	0.3242	0.3419	0.3444	0.3311	0.3175	0.3346	0.2171	0.2025	0.2481	0.2585
E	0.2696	0.256	0.2558	0.2467	0.5707	0.4582	0.5445	0.4965	0.5694	0.4049	0.5612	0.4916
F
G
H
blank	0.4085
dilution factor	5		Y= 0.0019x - 0.0166
sample number	OD value	corrected OD value	CD163 (ng/L)
1	0.4085	0.3069	0.3577
2	0.3952	0.3189	0.35705
3	0.3816	0.3242	0.3529
4	0.3987	0.3419	0.3703
5	0.371	0.3444	0.3577
6	0.383	0.3311	0.35705		0.359487
7	0.3883	0.3175	0.3529
8	0.406	0.3346	0.3703	0.359487	1
9	0.2812	0.2171	0.24915
10	0.2666	0.2025	0.23455
11	0.2122	0.2481	0.23015
12	0.2226	0.2585	0.24055
13	0.2337	0.2696	0.25165
14	0.2201	0.256	0.23805
15	0.2599	0.2558	0.25785
16	0.2108	0.2467	0.22875	0.241337	0.671338
17	0.5348	0.5707	0.55275
18	0.4223	0.4582	0.44025
19	0.5091	0.5445	0.5268
20	0.4606	0.4965	0.47855
21	0.5335	0.5694	0.55145
22	0.469	0.4049	0.43695
23	0.5253	0.5612	0.54325
24	0.4557	0.4916	0.47365	0.500456	1.39214
