# Supplementary material for: 4-week aerobic exercise training regulates systemic macrophage polarization in obese mice
Source: PeerJ journal article supplement (doi:10.7717/peerj.20604), 2026-01-15
Supplement: Measured_raw_data.zip [file TNF-alpha ELISA.xlsx]

## Sheet: TNF-α
				TNF-α
MULTISKAN MS PRIMARY EIA V. 1.5-0
ABSORBANCE MODE
CONTINUOUS MOVEMENT
FILTER	450nm
SINGLE WELL BLANK		0.0438
ABSORBANCES
Plate 1
	1	2	3	4	5	6	7	8	9	10	11	12
A	blank	50 ng/L	100 ng/L	200 ng/L	400 ng/L	800 ng/L								Conc.（ng/L）	50	100	200	400	800
B	1	2	3	4	5	6	7	8	9	10	11	12		OD value	0.1001	0.2516	0.5714	1.1799	2.1288
C	13	14	15	16	17	18	19	20	21	22	23	24
D
E
F
G
H
Reading（OD value）1
	1	2	3	4	5	6	7	8	9	10	11	12
A	0.0438	0.1439	0.2954	0.6152	1.2237	2.1726
B	0.3845	0.3984	0.3696	0.3709	0.3497	0.3458	0.3563	0.4013	0.5071	0.5544	0.4985	0.5494
C	0.5367	0.4868	0.4934	0.4145	0.395	0.3983	0.4184	0.4214	0.3992	0.4594	0.4153	0.4558
D
E
F
G
H
blank	0.0438
dilution factor	5		Y= 0.0027x + 0.0067_x000B_
sample number	OD value	corrected OD value	TNF-α conc.(ng/L)
1	0.3845	0.3407	618.519
2	0.3984	0.3546	644.259
3	0.3696	0.3258	590.926
4	0.3709	0.3271	593.333
5	0.3497	0.3059	554.074
6	0.3458	0.302	546.852
7	0.3563	0.3125	566.296
8	0.4013	0.3575	649.63	595.486	39.2766
9	0.5071	0.4633	845.556
10	0.5544	0.5106	933.148
11	0.4985	0.4547	829.63
12	0.5494	0.5056	923.889
13	0.5367	0.4929	900.37
14	0.4868	0.443	807.963
15	0.4934	0.4496	820.185
16	0.4145	0.3707	674.074	841.852	83.1693
17	0.395	0.3512	637.963
18	0.3983	0.3545	644.074
19	0.4184	0.3746	681.296
20	0.4214	0.3776	686.852
21	0.3992	0.3554	645.741
22	0.4594	0.4156	757.222
23	0.4153	0.3715	675.556
24	0.4558	0.412	750.556	684.907	46.3659
